# Supplementary material
Source: PubMed Central journal article supplement (PMC3844099)
Supplement: NIHMS521607-supplement-01.pdf [file NIHMS521607-supplement-01.pdf]

## Supplementary Data

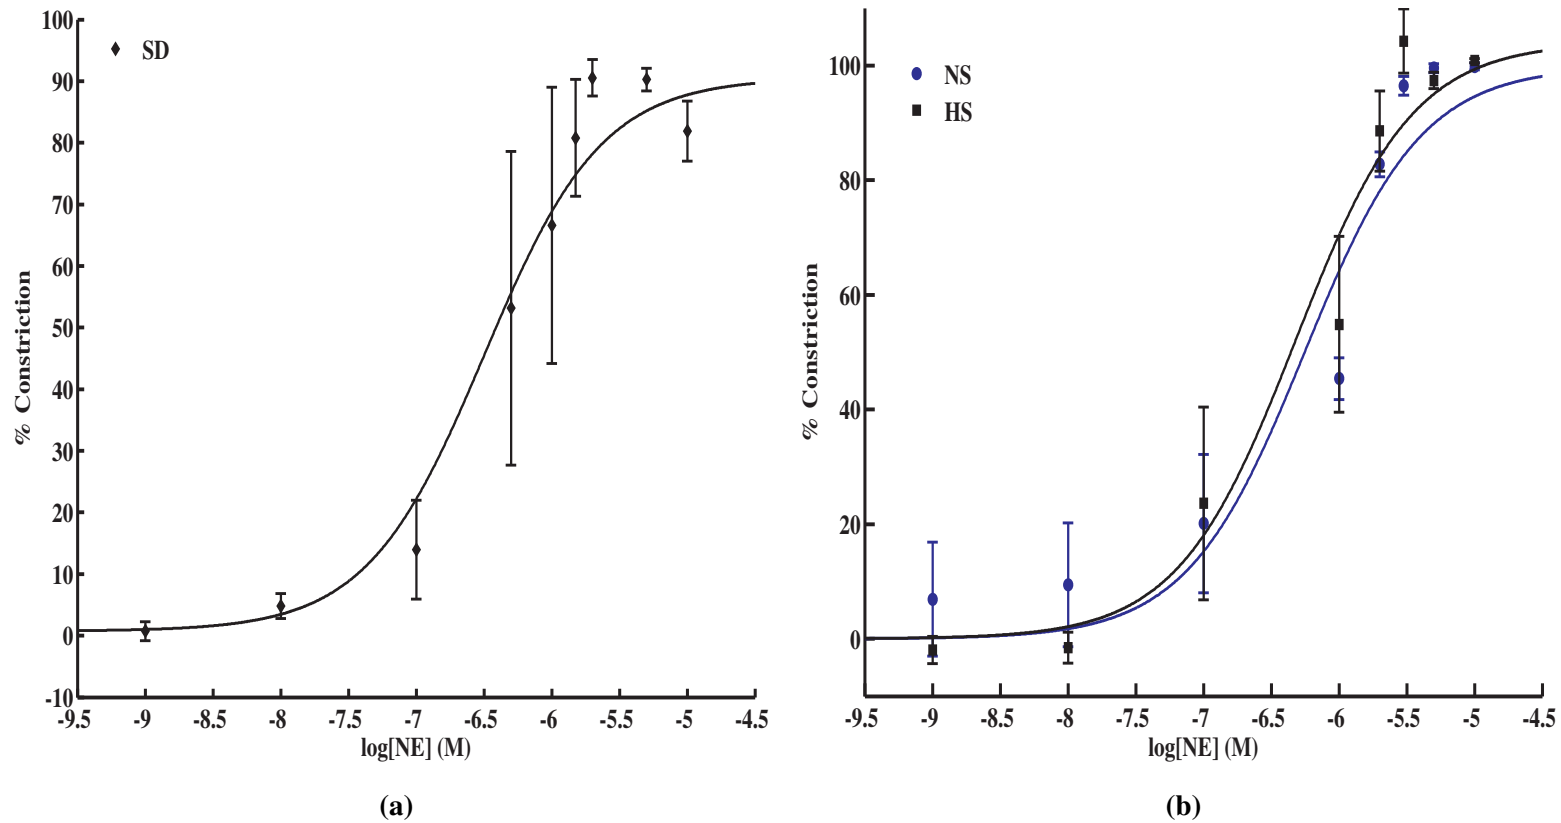

Figure S1.

Figure S1. Contractile response of mesenteric arterioles to norepinephrine in (a) Sprague Dawley rats (◆) and (b) Dahl rats fed NS (●) and HS (■) diet (n = 3). The data are expressed as mean ± SEM.

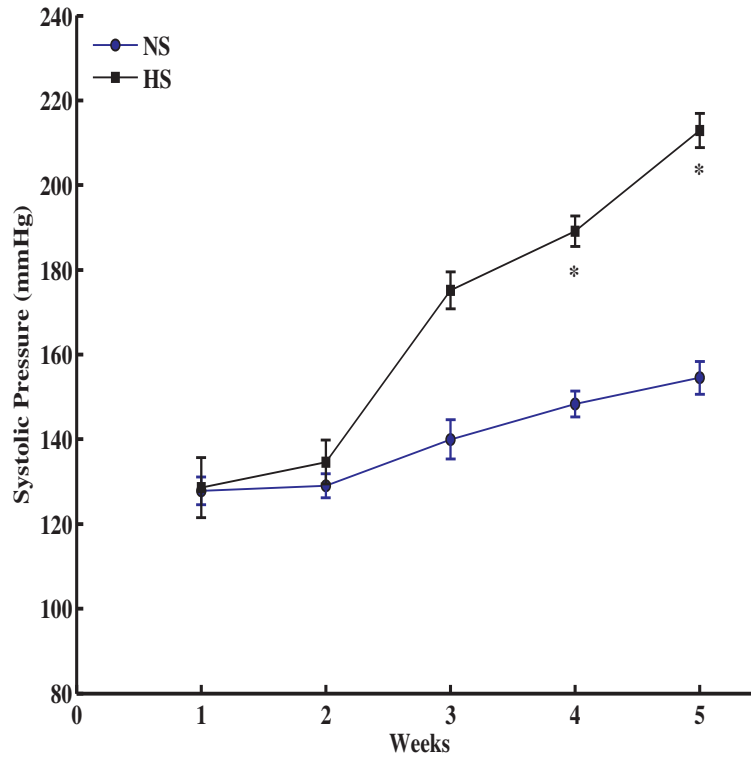

**Figure S2.**

**Figure S2. Time course of systolic blood pressure as measured by tail-cuff method in Dahl rats placed on NS (●) and HS (■) diet for 5 weeks (n = 11). The data are expressed as mean  $\pm$  SEM; \*P < 0.05 vs. NS.**

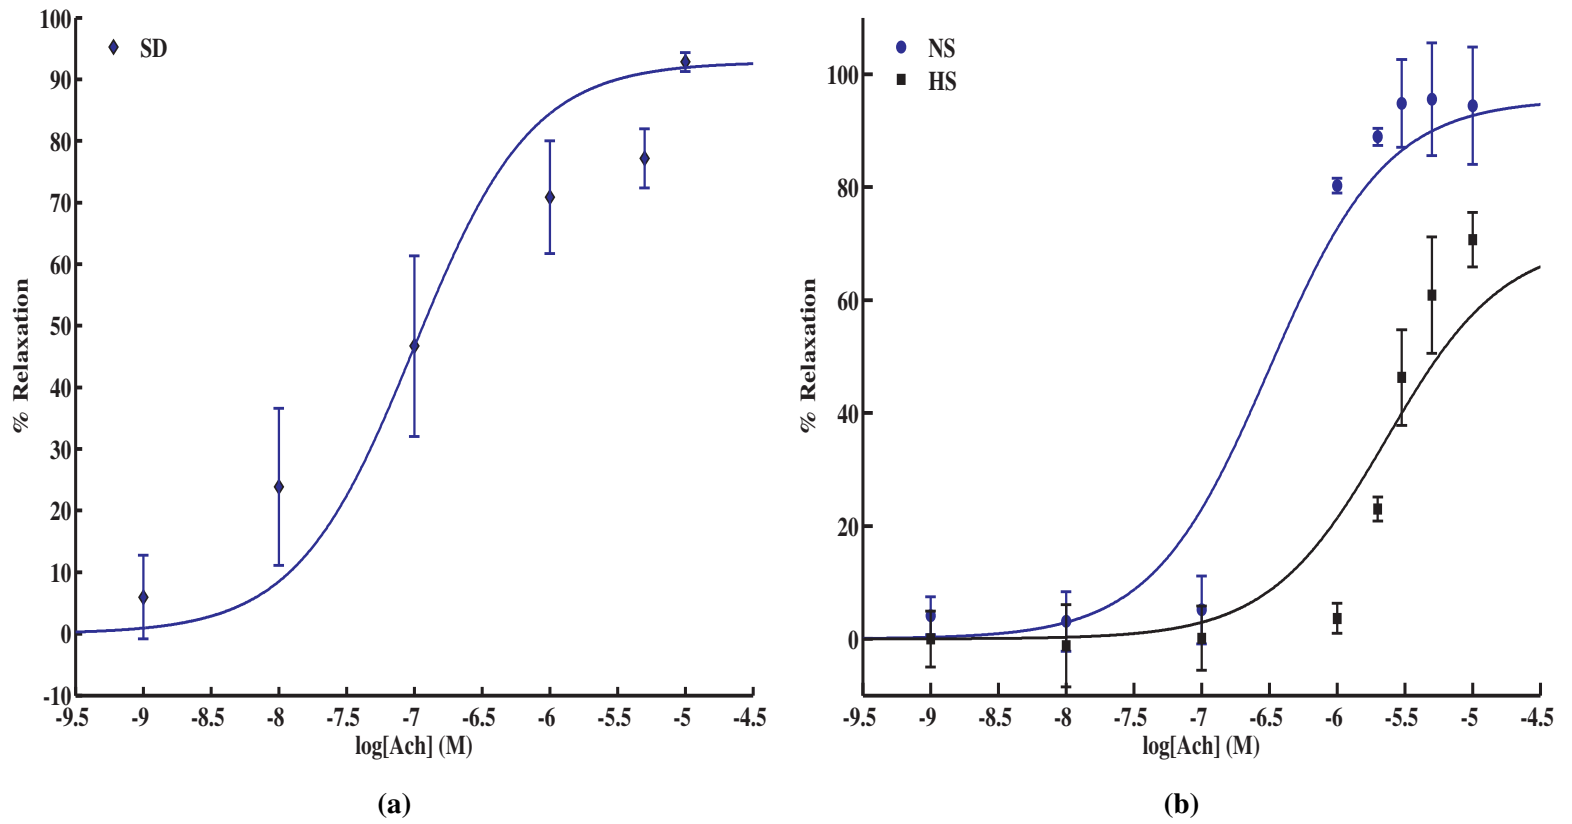

Figure S3.

Figure S3. Concentration-dependent relaxation response to acetylcholine in precontracted mesenteric arterioles of (a) SD rats (◆) (n = 6) and (b) Dahl rats fed NS (●) and HS (■) diet (n = 3). The data are expressed as mean ± SEM.

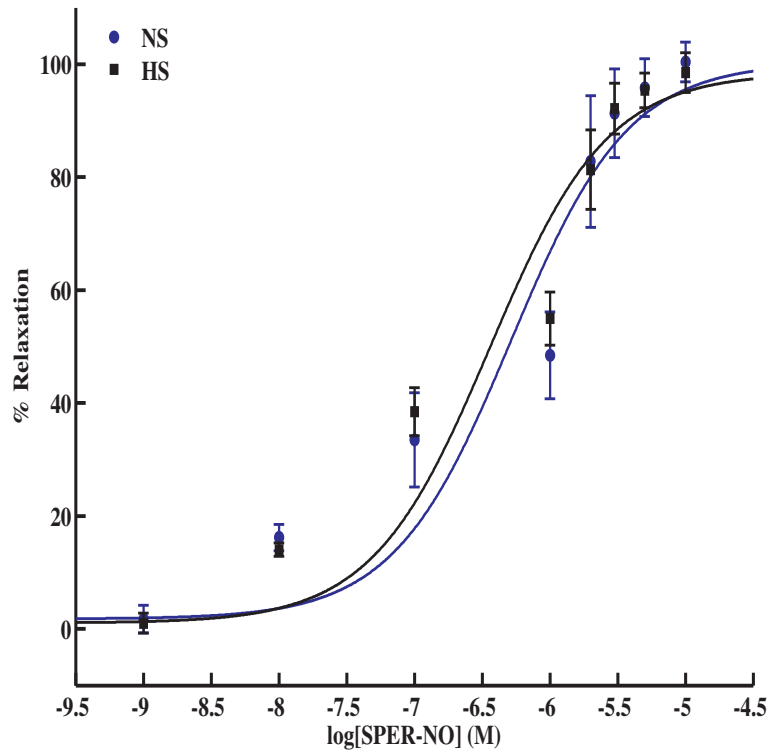

**Figure S4.**

**Figure S4. Relaxation to SPER-NO in 2  $\mu$ M NE precontracted mesenteric arterioles of NS (●) and HS (■) fed Dahl rats (n = 3). The data are expressed as mean  $\pm$  SEM.**
